# Supplementary material
Source: PubMed Central journal article supplement (PMC7334047)

# Supplementary Figure 1

Figure 2c

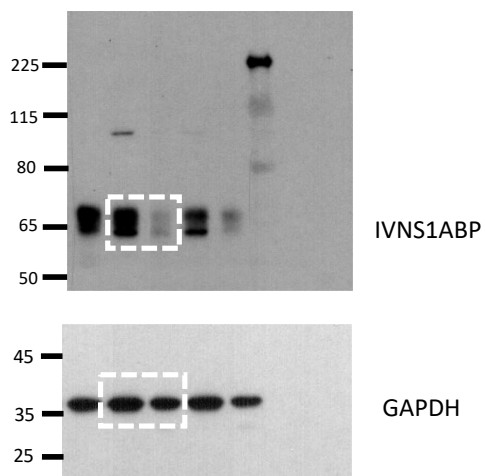

Figure 3c

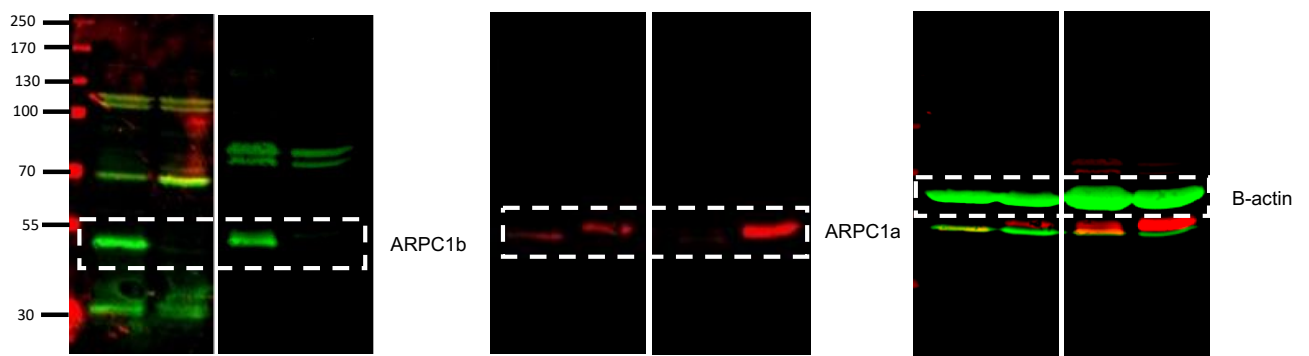

Supplementary Figure 4c

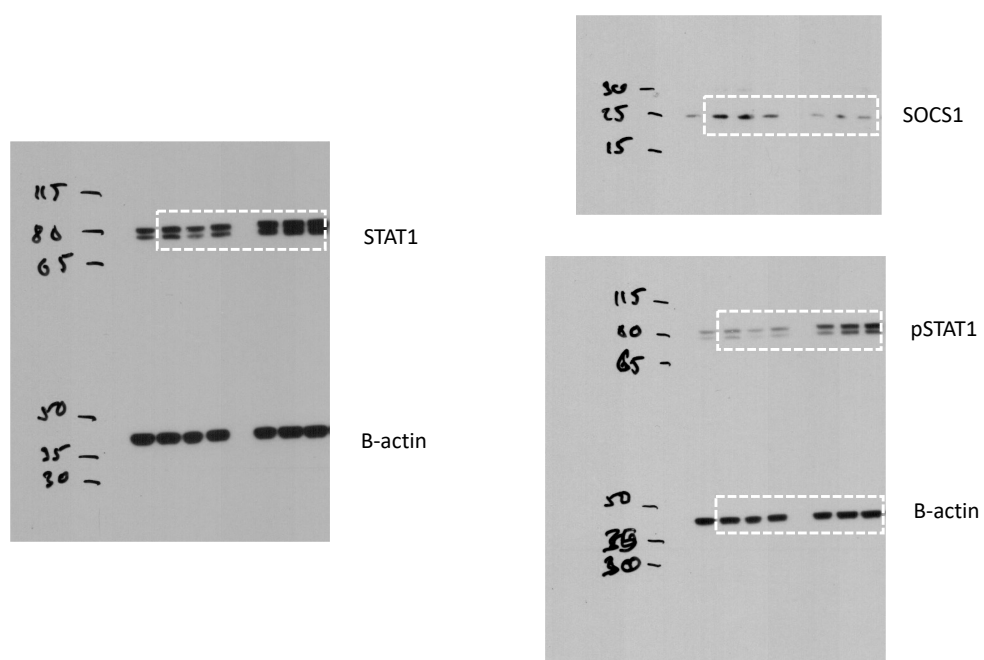

## Gating Strategy T cells

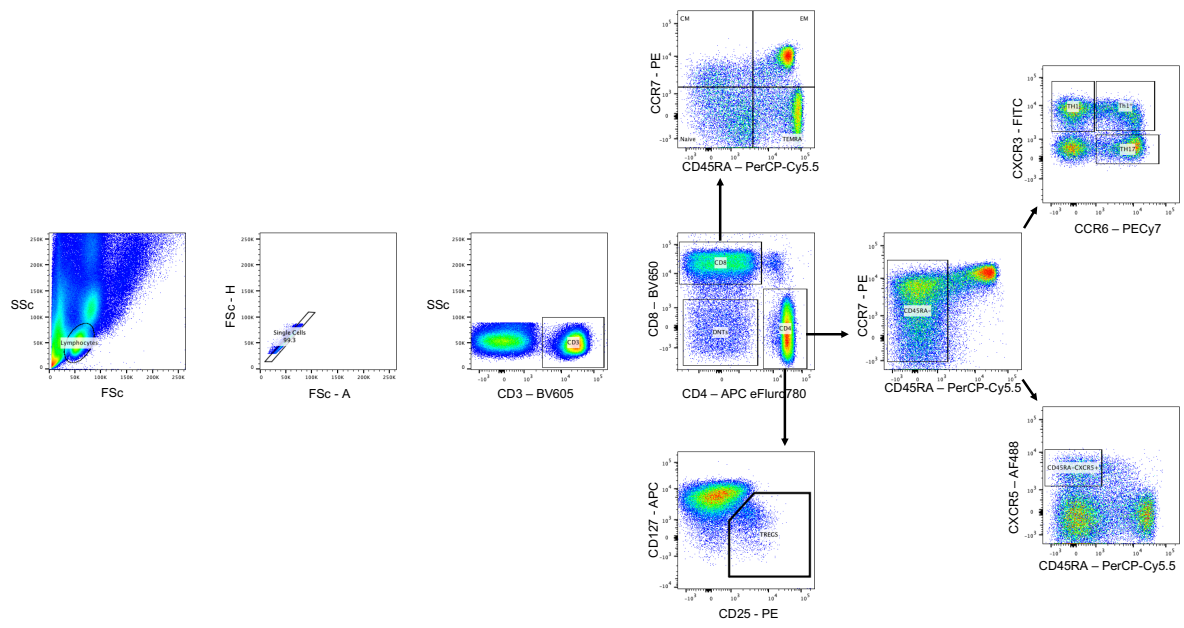

## Gating Strategy B cells

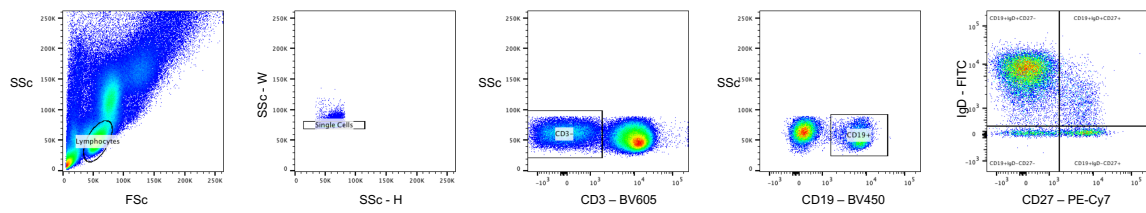

Supplement: EMS85907-supplement-Supp_Fig_1.pdf [file EMS85907-supplement-Supp_Fig_1.pdf]
